# Supplementary material
Source: ML conference proceedings conference paper supplement (https://openaccess.thecvf.com/content/CVPR2025/html/Feijoo_DarkIR_Robust_Low-Light_CVPR_2025_paper.html)
Supplement: Supplementary file 1 [file Feijoo_DarkIR_Robust_Low-Light_CVPR_2025_supplemental.pdf]

# DarkIR: Robust Low-Light Image Restoration

## — Supplementary Material —

Daniel Feijoo<sup>1†</sup>, Juan C. Benito<sup>1</sup>, Alvaro Garcia<sup>1</sup>, Marcos V. Conde<sup>1,2†</sup>

<sup>1</sup> Cidaut AI, Valladolid, Spain

<sup>2</sup> Computer Vision Lab, University of Würzburg, Germany

<https://github.com/cidautai/DarkIR> † Corresponding Authors {danfei,marcos.conde@cidaut.es}

### 1. Additional Implementation Details

Our implementation is based on PyTorch [12]. We train DarkIR (following LEDNet [19]) on the LOLBlur dataset. During training, we randomly crop  $384 \times 384$  patches, and apply standard flip and rotation augmentations. The mini-batch size is set to 32 using an H100 GPU.

As our optimizer we use AdamW [8] by setting  $\beta_1 = 0.9$ ,  $\beta_2 = 0.9$  and weight decay to  $1e^{-3}$ . The learning rate is initialized to  $5e^{-4}$  and is updated by the cosine annealing strategy [7] to a minimum of  $1e^{-6}$ . We repeat this configuration for re-training the other methods in LOLBlur dataset. Note that we use the official open-source implementation of the other methods, or previously reported results.

The **multi-task** model was trained using the same setup. The only difference is the use of LOLv2 and LSRW as additional datasets. This model achieves essentially state-of-the-art results on real low-light enhancement benchmarks, while maintaining the performance on LOLBlur.

### 2. Additional ablation Studies

We studied the influence of the optimization losses. The results can be seen on Table A, where we can check that by introducing the  $L_{edge}$ ,  $L_{lol}$  and  $L_{percep}$  the model achieves the best combination of distortion and perceptual metrics.

Table A. Ablation study on our loss functions. We train DarkIR using different loss setups. Adding the perceptual loss ( $L_{percep}$ ), edge loss ( $L_{edge}$ ) and the architecture guiding loss ( $L_{lol}$ ) helps to improve the overall performance.

|                                               | PSNR↑         | SSIM↑        | LPIPS↓       |
|-----------------------------------------------|---------------|--------------|--------------|
| $L_{pixel}$                                   | 26.34         | 0.856        | 0.205        |
| $L_{pixel} + L_{lol}$                         | 26.19         | 0.861        | 0.197        |
| $L_{pixel} + L_{lol} + L_{edge}$              | <u>26.717</u> | 0.874        | 0.182        |
| $L_{pixel} + L_{percep} + L_{edge}$           | 26.61         | <b>0.877</b> | <b>0.171</b> |
| $L_{pixel} + L_{lol} + L_{edge} + L_{percep}$ | <b>26.9</b>   | <u>0.874</u> | <u>0.176</u> |

Table B. Ablation study on the feature propagation between encoder and decoder. We found simple addition to be optimal.

|                    | Params↓ (M) | MACs↓ (G)   | PSNR↑       | SSIM↑        | LPIPS↓       |
|--------------------|-------------|-------------|-------------|--------------|--------------|
| CurveNLU           | 4.05        | 14.14       | 26.55       | 0.872        | 0.176        |
| CurveNLU-DepthWise | 3.33        | 7.42        | 26.64       | 0.872        | 0.177        |
| 1DLUT              | 3.39        | 7.87        | 26.69       | 0.873        | <b>0.175</b> |
| 1DLUT-double       | 3.49        | 8.9         | 26.63       | <b>0.875</b> | <u>0.175</u> |
| Single Addition    | <b>3.31</b> | <b>7.25</b> | <b>26.9</b> | <u>0.874</u> | 0.176        |

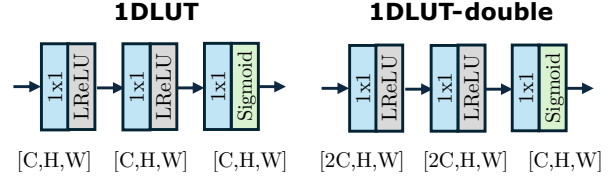

Figure A. Neural blocks proposed for the feature propagation. The difference between both is the presence of a channel expansion in **1DLUT-double**.

In addition, we studied different skip connections for the feature propagation between encoder and decoder. The proposed feature propagation takes the form of:

$$y = f_{prop}(enc_{feat}) + dec_{feat} \quad (1)$$

where  $f_{prop}$  is the proposed feature block applied to the encoder features ( $enc_{feat}$ ) added to the decoder features ( $dec_{feat}$ ). Besides the CurveNLU proposed by LEDNet [19] we evaluate the results obtained by using only depth-wise convolutions in this given block. To sum up we incorporate a variation of this block that uses only point-wise convolutions, resembling the behaviour of a look-up table (LUT). Figure A represents the proposed 1DLUT variations. In Table B the results of this ablation study are showcased. We see that the single addition, i.e  $f_{prop} = Identity$  gets the best performance, so we did not consider adding any of the discussed blocks to the DarkIR architecture.

Table C. Quantitative comparison on five **real-world unpaired LLIE** datasets using the perceptual quality metrics BRISQUE [10] and NIQE [11]. We use reference results from [17].

| LLIE<br>Unpaired | DICM         |             | LIME         |             | MEF          |             | NPE          |             | VV           |             |
|------------------|--------------|-------------|--------------|-------------|--------------|-------------|--------------|-------------|--------------|-------------|
|                  | BRISQUE↓     | NIQE↓       |
| KinD [18]        | 48.72        | 5.15        | 39.91        | 5.03        | 49.94        | 5.47        | 36.85        | 4.98        | 50.56        | 4.30        |
| ZeroDCE [2]      | 27.56        | 4.58        | <u>20.44</u> | 5.82        | 17.32        | 4.93        | 20.72        | 4.53        | 34.66        | 4.81        |
| RUAS [6]         | 38.75        | 5.21        | 27.59        | 4.26        | 23.68        | 3.83        | 47.85        | 5.53        | 38.37        | 4.29        |
| SNR-Net [16]     | 37.35        | 4.71        | 39.22        | 5.74        | 31.28        | 4.18        | 26.65        | 4.32        | 78.72        | 9           |
| CIDNet [17]      | 21.47        | 3.79        | <b>16.25</b> | <u>4.13</u> | <b>13.77</b> | <u>3.56</u> | <u>18.92</u> | <b>3.74</b> | <u>30.63</u> | <b>3.21</b> |
| <b>DarkIR-mt</b> | <b>18.69</b> | <b>3.76</b> | 21.62        | <b>4.07</b> | <u>13.90</u> | <b>3.45</b> | <b>12.88</b> | <u>3.99</u> | <b>26.87</b> | <u>3.74</u> |

### 3. More quantitative results in unpaired data

In addition to the results of unpaired Real-LOLBlur datasets, in Table C we present the results of our model in 5 well-known unpaired datasets: LIME [3], DICM [5], MEF [9], NPE [15] and VV [14]. We use the multi-task model trained in LOLBLur and in the LOL datasets. We report BRISQUE [10] and NIQE [11] metrics.

### 4. More qualitative results in LLIE

As we indicated in the paper, we present more qualitative results in Figures B, C and D. These results showcase the power of our multi-task model for LLIE restoration. Then, in Figures E, F and G we show more qualitative results on the LLIE-Deblurring task.

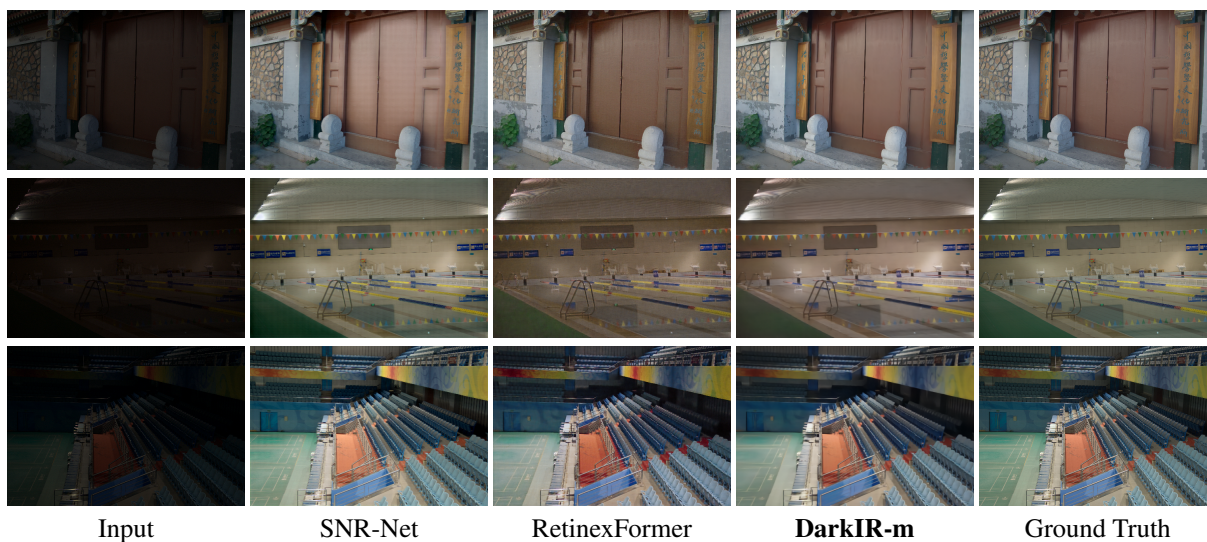

Figure B. Qualitative results compared with state of the art method RetinexFormer [1] and SNR-Net [16] on LOLv2-Real.

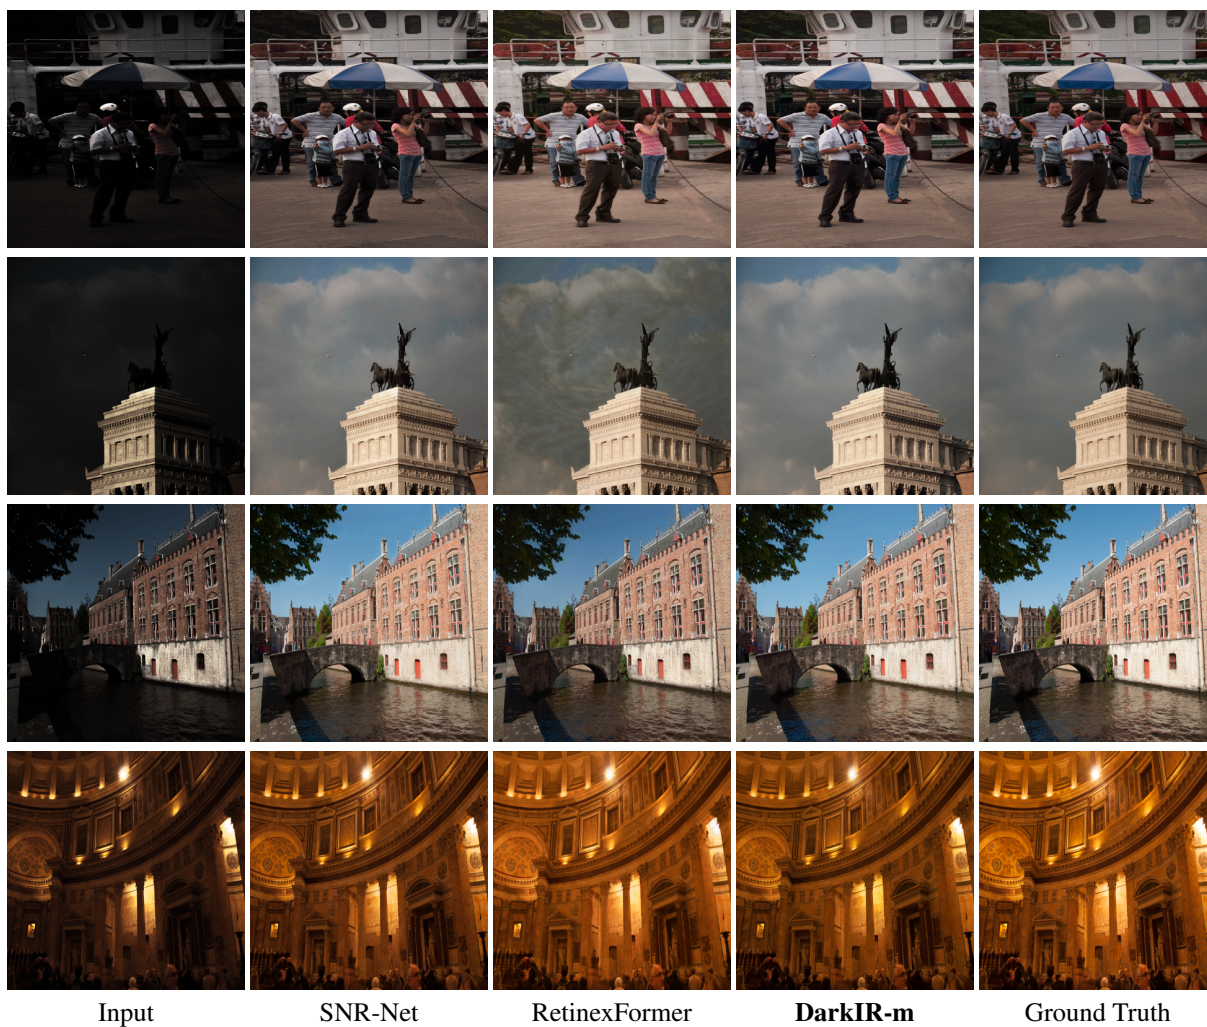

Figure C. Qualitative results compared with state of the art method RetinexFormer [1] and SNR-Net [16] on LOLv2-Synthetic.



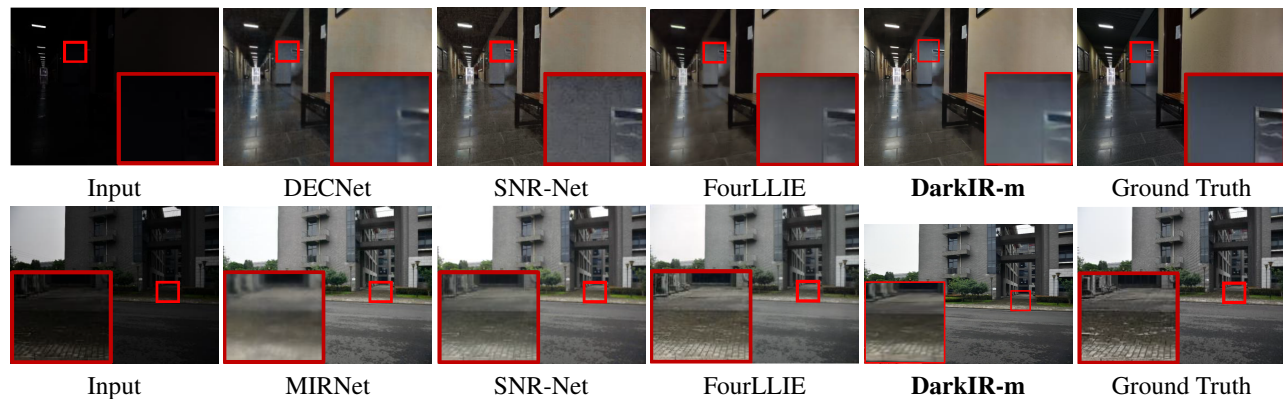

Figure D. Qualitative results on the real-world dataset **LSRW-Huawei** [4] (top row) and **LSRW-Nikon** [4] (bottom row).

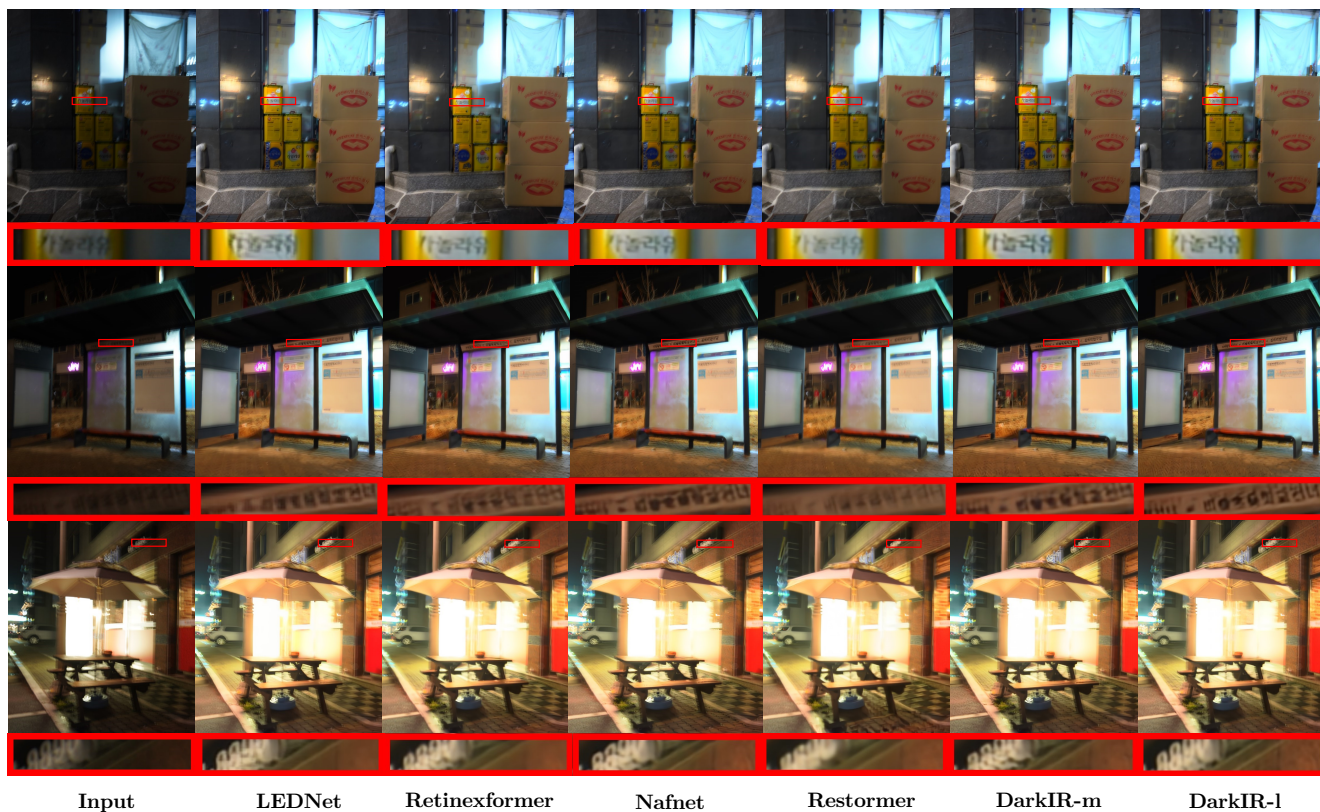

Figure E. Qualitative results on **RealBlur-Night** [13] images. (Zoom in for best view).



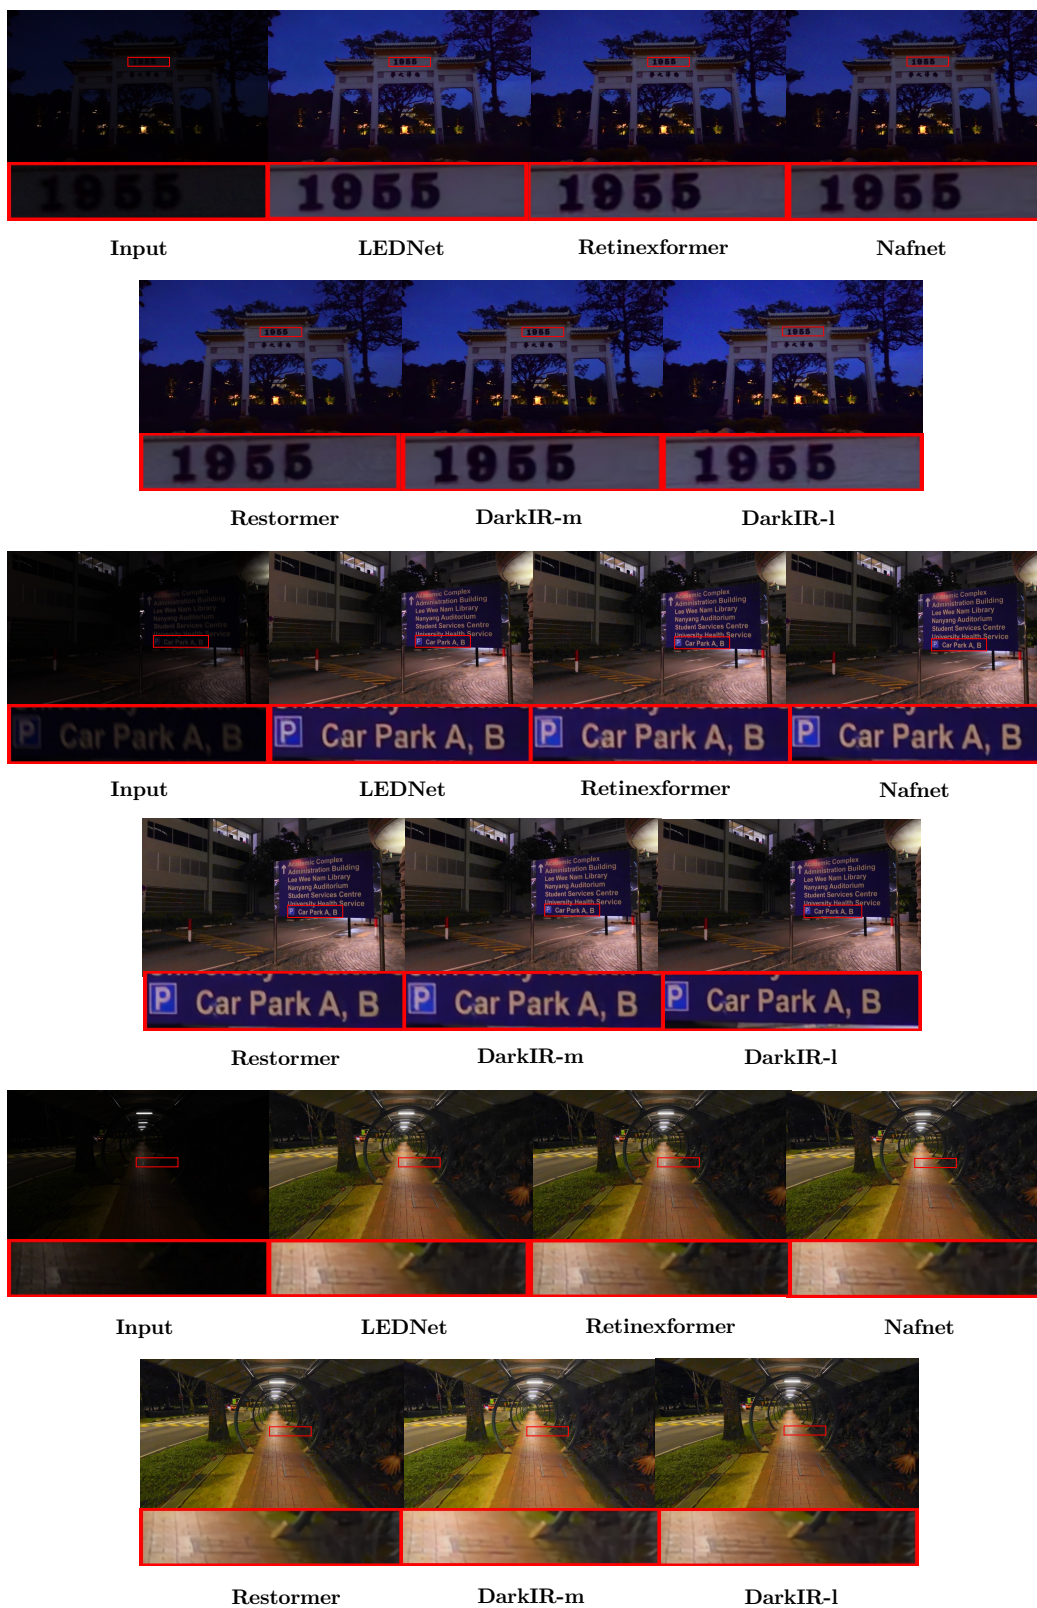

Figure F. Qualitative results in **Real-LOLBlur** [19] dataset. (Zoom in for best view).

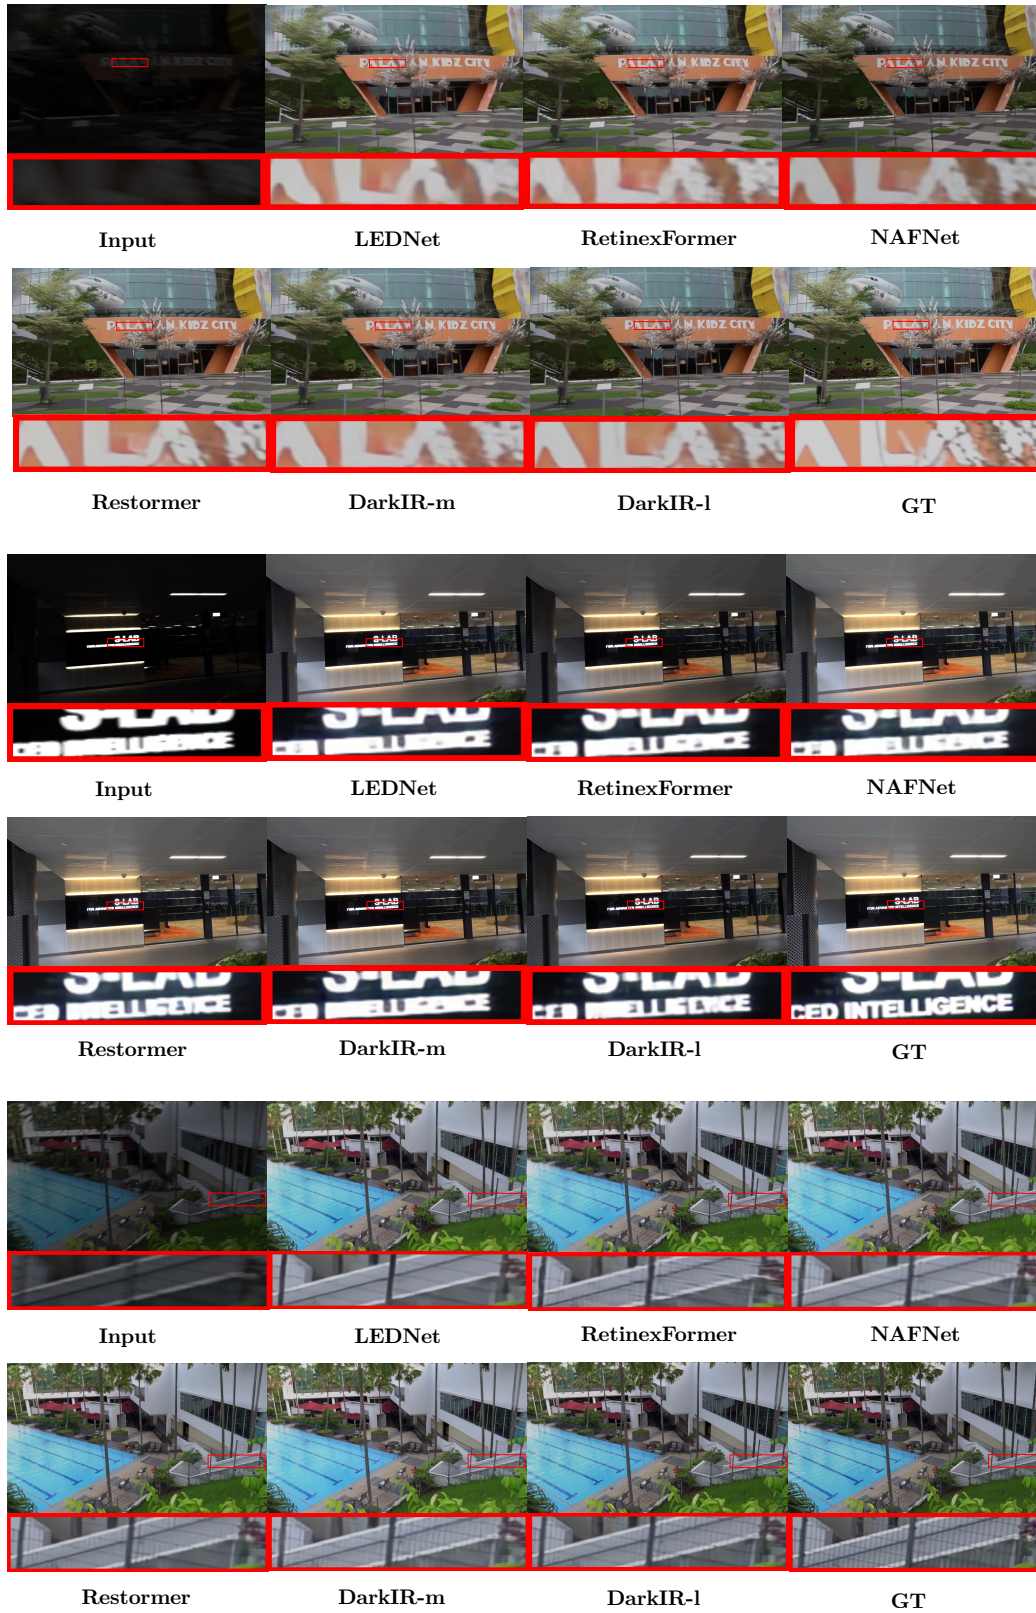

Figure G. Qualitative results in **LOLBlur** [19] dataset. As we can see, **DarkIR** gets sharper and brighter results than the other methods. (Zoom in for best view).



## References

- [1] Yuanhao Cai, Hao Bian, Jing Lin, Haoqian Wang, Radu Timofte, and Yulun Zhang. Retinexformer: One-stage retinex-based transformer for low-light image enhancement. In *Proceedings of the IEEE/CVF International Conference on Computer Vision*, pages 12504–12513, 2023. [3](#)
- [2] Chunle Guo Guo, Chongyi Li, Jichang Guo, Chen Change Loy, Junhui Hou, Sam Kwong, and Runmin Cong. Zero-reference deep curve estimation for low-light image enhancement. In *Proceedings of the IEEE conference on computer vision and pattern recognition (CVPR)*, pages 1780–1789, 2020. [2](#)
- [3] Xiaojie Guo, Yu Li, and Haibin Ling. Lime: Low-light image enhancement via illumination map estimation. *IEEE Transactions on image processing*, 26(2):982–993, 2016. [2](#)
- [4] Jiang Hai, Zhu Xuan, Ren Yang, Yutong Hao, Fengzhu Zou, Fang Lin, and Songchen Han. R2rnet: Low-light image enhancement via real-low to real-normal network. *Journal of Visual Communication and Image Representation*, 90: 103712, 2023. [4](#)
- [5] Chulwoo Lee, Chul Lee, and Chang-Su Kim. Contrast enhancement based on layered difference representation of 2d histograms. *IEEE transactions on image processing*, 22(12): 5372–5384, 2013. [2](#)
- [6] Risheng Liu, Long Ma, Jiaao Zhang, Xin Fan, and Zhongxuan Luo. Retinex-inspired unrolling with cooperative prior architecture search for low-light image enhancement. In *Proceedings of the IEEE/CVF conference on computer vision and pattern recognition*, pages 10561–10570, 2021. [2](#)
- [7] Ilya Loshchilov and Frank Hutter. Sgdr: Stochastic gradient descent with warm restarts. *arXiv preprint arXiv:1608.03983*, 2016. [1](#)
- [8] Ilya Loshchilov and Frank Hutter. Decoupled weight decay regularization, 2019. [1](#)
- [9] Kede Ma, Kai Zeng, and Zhou Wang. Perceptual quality assessment for multi-exposure image fusion. *IEEE Transactions on Image Processing*, 24(11):3345–3356, 2015. [2](#)
- [10] Anish Mittal, Anush Krishna Moorthy, and Alan Conrad Bovik. No-reference image quality assessment in the spatial domain. *IEEE Transactions on image processing*, 21(12): 4695–4708, 2012. [2](#)
- [11] Anish Mittal, Rajiv Soundararajan, and Alan C Bovik. Making a “completely blind” image quality analyzer. *IEEE Signal processing letters*, 20(3):209–212, 2012. [2](#)
- [12] Adam Paszke, Sam Gross, Francisco Massa, Adam Lerer, James Bradbury, Gregory Chanan, Trevor Killeen, Zeming Lin, Natalia Gimelshein, Luca Antiga, et al. Pytorch: An imperative style, high-performance deep learning library. *Advances in neural information processing systems*, 32, 2019. [1](#)
- [13] Jaesung Rim, Haeyun Lee, Jucheol Won, and Sunghyun Cho. Real-world blur dataset for learning and benchmarking deblurring algorithms. In *Proceedings of the European Conference on Computer Vision (ECCV)*, 2020. [4](#)
- [14] Vassilios Vonikakis, Rigas Kouskouridas, and Antonios Gasteratos. On the evaluation of illumination compensation algorithms. *Multimedia Tools and Applications*, 77:9211–9231, 2018. [2](#)
- [15] Shuhang Wang, Jin Zheng, Hai-Miao Hu, and Bo Li. Naturalness preserved enhancement algorithm for non-uniform illumination images. *IEEE transactions on image processing*, 22(9):3538–3548, 2013. [2](#)
- [16] Xiaogang Xu, Ruixing Wang, Chi-Wing Fu, and Jiaya Jia. Snr-aware low-light image enhancement. In *CVPR*, 2022. [2](#), [3](#)
- [17] Qingsen Yan, Yixu Feng, Cheng Zhang, Pei Wang, Peng Wu, Wei Dong, Jinqiu Sun, and Yanning Zhang. You only need one color space: An efficient network for low-light image enhancement. *arXiv preprint arXiv:2402.05809*, 2024. [2](#)
- [18] Yonghua Zhang, Xiaojie Guo, Jiayi Ma, Wei Liu, and Jiawan Zhang. Beyond brightening low-light images. *International Journal of Computer Vision*, 129:1013–1037, 2021. [2](#)
- [19] Shangchen Zhou, Chongyi Li, and Chen Change Loy. Led-net: Joint low-light enhancement and deblurring in the dark. In *ECCV*, 2022. [1](#), [5](#), [6](#)
